# Supplementary material for: Prevalence and mechanisms of somatic deletions in single human neurons during normal aging and in DNA repair disorders
Source: PubMed Central journal article supplement (PMC9546902; doi:10.1038/s41467-022-33642-w), 2022-10-07
Supplement: 41467_2022_33642_MOESM3_ESM.pdf [file 41467_2022_33642_MOESM3_ESM.pdf]

**File name: Supplementary Data 1**

Description: Estimated somatic deletion rate per neuron

**File name: Supplementary Data 2**

Description: Gene ontology terms enriched for somatic deletions

**File name: Source Data Fig. 1**

Description: Includes source data for figures 1b, d, e.

**File name: Source Data Fig. 3**

Description: Includes source data for figures 3a, b, c, d, e.

**File name: Source Data Fig. 4**

Description: Includes source data for figures 4b, c, d, e.

**File name: Source Data Fig. S1**

Description: Includes source data for supplementary figures 1a, b, c, d, e, f.

**File name: Source Data Fig. S3**

Description: Includes source data for supplementary figures 3b, d.

**File name: Source Data Fig. S4**

Description: Includes source data for supplementary figures 4a, b, c, d, e.

**File name: Source Data Fig. S5**

Description: Includes source data for supplementary figure 5.

**File name: Source Data Fig. S6**

Description: Includes source data for supplementary figures 6a, b, c, d.
